# Supplementary material for: A Systematic review protocol on workplace equality and inclusion practices in the healthcare sector
Source: HighWire-hosted journal article supplement (doi:10.1136/bmjopen-2022-064939), 2023-03-01
Supplement: bmjopen-2022-064939supp001_data_supplement.pdf [file bmjopen-2022-064939supp001_data_supplement.pdf]

## **Supplementary File 1**

### **Search Strategy for all Databases**

- 1 Significant consultations with
  - (A) Librarian, Learning and Engagement Kemmy Business School, Mr. Peter Reilly and
  - (B) Librarian, Health Research Methods, Ms. Liz Dorsregarding relevant Databases and appropriate Boolean Terms.
- 2 Databases that needed to be screened for this study:
  - A Cinahl Complete
  - B Embase
  - C PsycInfo
  - D Scopus
  - E Medline (Pubmed & Ovid)
  - F Business Source Complete
  - G Google Scholar
- 3 After consultation with the above librarians, the following Boolean Terms were utilized in the above search engines:
  - A Equality and Inclusion
  - B Equality and Inclusion and healthcare
  - C Staff Equality and Inclusion and leadership
  - D Staff Equality and Inclusion and Professional development
  - E Staff Equality and Inclusion and training and development
  - F Staff Equality and Inclusion and staff development
  - G Staff Equality and Inclusion and mentoring

## H Healthcare Employees and Equality and Culture

**Note:** (1) In the above search, the word “and” is utilized to ensure all search engines cover all search terms simultaneously, for example equality and inclusion. This is a vital step in the process as excluding the word “and” means articles relating to equality are included only.

### 4 Filters

The following filters were applied in the above search engines:

#### A Publication Date (2010-2022)

**Note:** *The researcher could customize the dates, meaning the end date is the most recent (3rd November 2022)*

#### B Article Type – peer reviewed articles

### 5 Additional Filters

Limited to English language

### 6 Saving Citations

Citations will be saved to Endnote

**Note:** *The researcher can eliminate duplication of file*
